# Supplementary material for: Sorbicillinoid Derivatives with the Radical Scavenging Activities from the Marine-Derived Fungus Acremonium chrysogenum C10
Source: MDPI journal article supplement (doi:10.3390/jof8050530), 2022-05-20
Supplement: s1 [file s1]

**Sorbicillinoid Derivatives with the Radical Scavenging Activities from the  
Marine-Derived Fungus *Acremonium chrysogenum* C10**

**Chengbao Duan<sup>1,2,†</sup>, Shiyuan Wang<sup>1,2,†</sup>, Ruiyun Huo<sup>1,2,†</sup>, Erwei Li<sup>3</sup>, Min Wang<sup>4</sup>,  
Jinwei Ren<sup>1</sup>, Yuanyuan Pan<sup>1,\*</sup>, Ling Liu<sup>1,2,\*</sup> and Gang Liu<sup>1,2,\*</sup>**

1 State Key Laboratory of Mycology, Institute of Microbiology, Chinese Academy of Sciences, Beijing 100101, China; 18813111804@163.com (C.D.); wangshiyuan20@mailsucas.ac.cn (S.W.); huory@im.ac.cn (R.H.); renjw@im.ac.cn (J.R.); panyy@im.ac.cn (Y.P.); liul@im.ac.cn (L.L.); liug@im.ac.cn (G.L.)

2 University of Chinese Academy of Sciences, Beijing 100049, China

3 Institutional Center for Shared Technologies and Facilities, Institute of Microbiology, Chinese Academy of Sciences, Beijing 100101, China; liew@im.ac.cn (E.L.)

4 State Key Laboratory of Microbial Resources, Institute of Microbiology, Chinese Academy of Sciences, Beijing 100101, China; hualuozhisheng@126.com (M.W.)

<sup>†</sup>These authors contributed equally to this work.

\*Correspondences:

Yuanyuan Pan, E-mail: panyy@im.ac.cn; Tel.: +86-10-64806113

Ling Liu, E-mail: liul@im.ac.cn; Tel.: +86-10-64807043

Gang Liu, E-mail: liug@im.ac.cn; Tel.: +86-10-64806017

| <b>No.</b> | <b>Contents</b>                                                                                                            | <b>Pages</b> |
|------------|----------------------------------------------------------------------------------------------------------------------------|--------------|
| 1.         | Figure S1. <sup>1</sup> H NMR spectrum of acresorbicillinol A ( <b>1</b> ; 500 MHz, CD <sub>3</sub> OD)                    | 3            |
| 2.         | Figure S2. <sup>13</sup> C NMR spectrum of acresorbicillinol A ( <b>1</b> ; 125 MHz, CD <sub>3</sub> OD)                   | 4            |
| 3.         | Figure S3. <sup>1</sup> H- <sup>1</sup> H COSY spectrum of acresorbicillinol A ( <b>1</b> , CD <sub>3</sub> OD)            | 5            |
| 4.         | Figure S4. HSQC spectrum of acresorbicillinol A ( <b>1</b> , CD <sub>3</sub> OD)                                           | 6            |
| 5.         | Figure S5. HMBC spectrum of acresorbicillinol A ( <b>1</b> , CD <sub>3</sub> OD)                                           | 7            |
| 6.         | Figure S6. NOESY spectrum of acresorbicillinol A ( <b>1</b> , CD <sub>3</sub> OD)                                          | 8            |
| 7.         | Figure S7. <sup>1</sup> H NMR spectrum of acresorbicillinol B ( <b>2</b> ; 500 MHz, CD <sub>3</sub> OD)                    | 9            |
| 8.         | Figure S8. <sup>13</sup> C NMR spectrum of acresorbicillinol B ( <b>2</b> ; 125 MHz, CD <sub>3</sub> OD)                   | 10           |
| 9.         | Figure S9. <sup>1</sup> H- <sup>1</sup> H COSY spectrum of acresorbicillinol B ( <b>2</b> , CD <sub>3</sub> OD)            | 11           |
| 10.        | Figure S10. HSQC spectrum of acresorbicillinol B ( <b>2</b> , CD <sub>3</sub> OD)                                          | 12           |
| 11.        | Figure S11. HMBC spectrum of acresorbicillinol B ( <b>2</b> , CD <sub>3</sub> OD)                                          | 13           |
| 12.        | Figure S12. NOESY spectrum of acresorbicillinol B ( <b>2</b> , CD <sub>3</sub> OD)                                         | 14           |
| 13.        | Figure S13. <sup>1</sup> H NMR spectrum of acresorbicillinol C ( <b>3</b> ; 500 MHz, DMSO:CDCl <sub>3</sub> = 3:1)         | 15           |
| 14.        | Figure S14. <sup>13</sup> C NMR spectrum of acresorbicillinol C ( <b>3</b> ; 125 MHz, DMSO:CDCl <sub>3</sub> = 3:1)        | 16           |
| 15.        | Figure S15. <sup>1</sup> H- <sup>1</sup> H COSY spectrum of acresorbicillinol C ( <b>3</b> , DMSO:CDCl <sub>3</sub> = 3:1) | 17           |
| 16.        | Figure S16. HSQC spectrum of acresorbicillinol C ( <b>3</b> , DMSO:CDCl <sub>3</sub> = 3:1)                                | 18           |
| 17.        | Figure S17. HMBC spectrum of acresorbicillinol C ( <b>3</b> , DMSO:CDCl <sub>3</sub> = 3:1)                                | 19           |
| 18.        | Figure S18. NOESY spectrum of acresorbicillinol C ( <b>3</b> , DMSO:CDCl <sub>3</sub> = 3:1)                               | 20           |
| 19.        | Figure S19. ECD conformers of acresorbicillinols A–C ( <b>1–3</b> )                                                        | 21           |
| 20.        | Figure S20. HPLC profiles of the extracts from the rice solid medium of <i>A. chrysogenum</i> after 7 days fermentation    | 25           |
| 21.        | Tale S1: Primers used in this study                                                                                        | 26           |

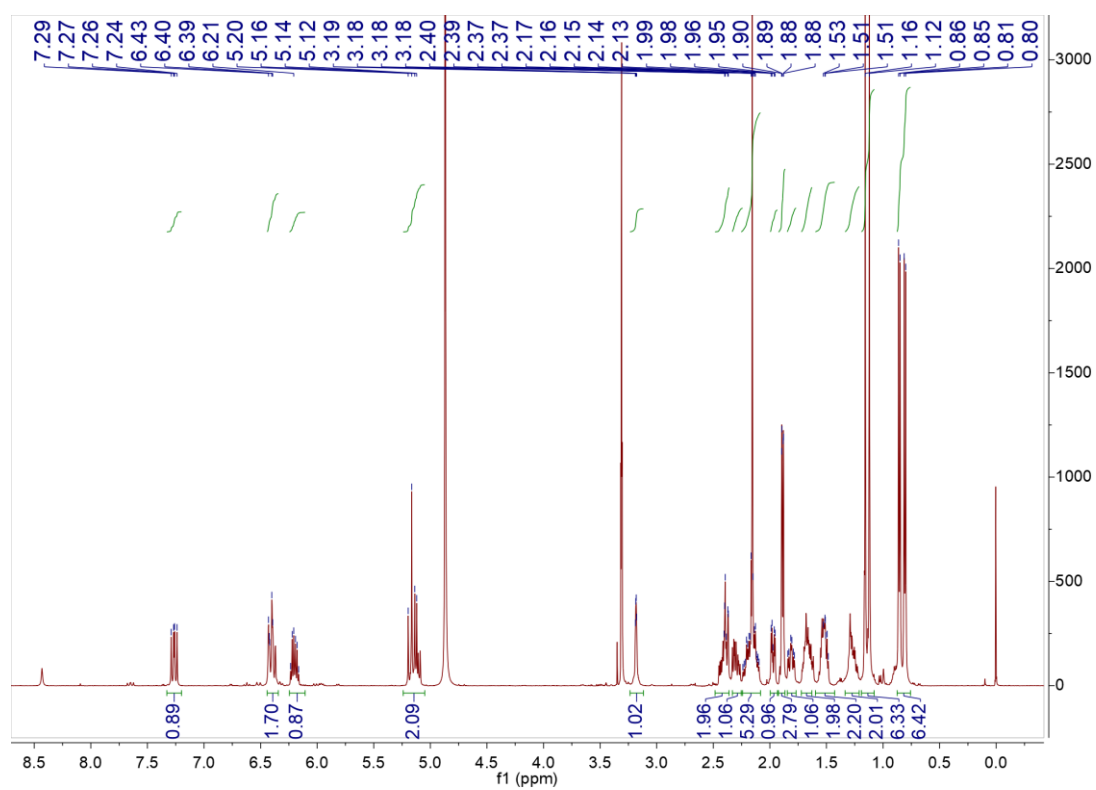

**Figure S1.**  $^1\text{H}$  NMR spectrum of acrosorbicillinol A (**1**; 500 MHz,  $\text{CD}_3\text{OD}$ )

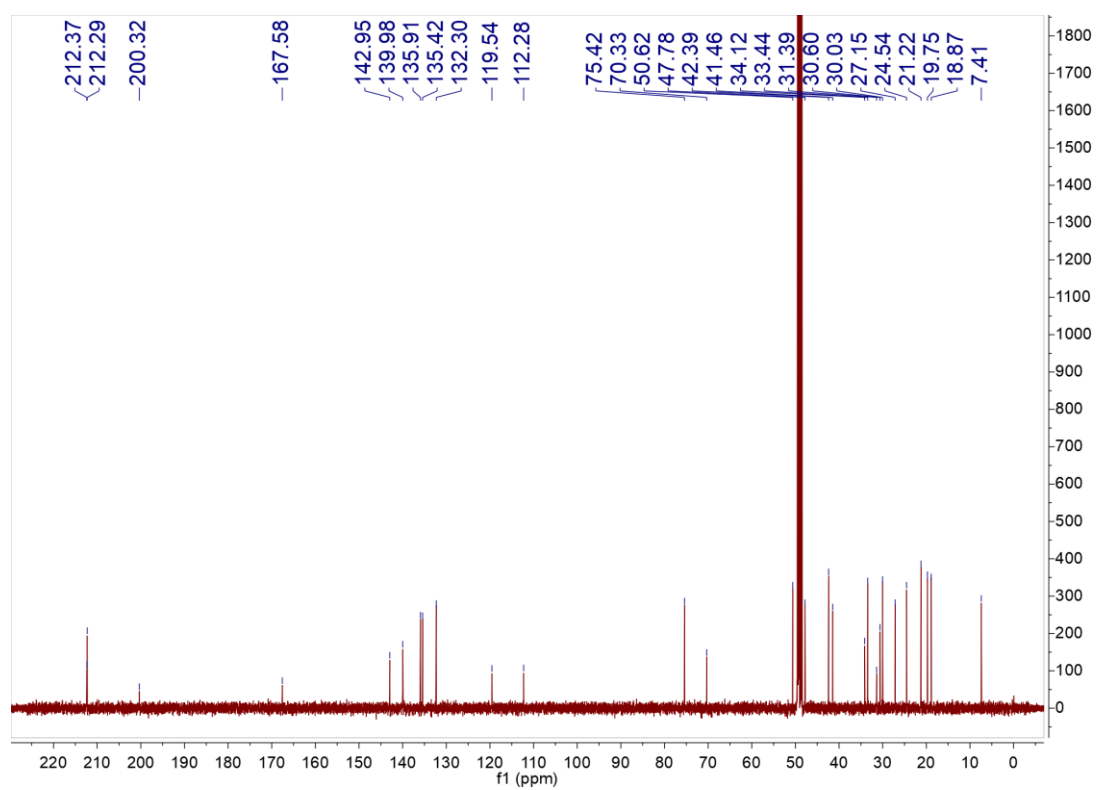

**Figure S2.**  $^{13}\text{C}$  NMR spectrum of acresorbicillinol A (**1**; 125 MHz,  $\text{CD}_3\text{OD}$ )

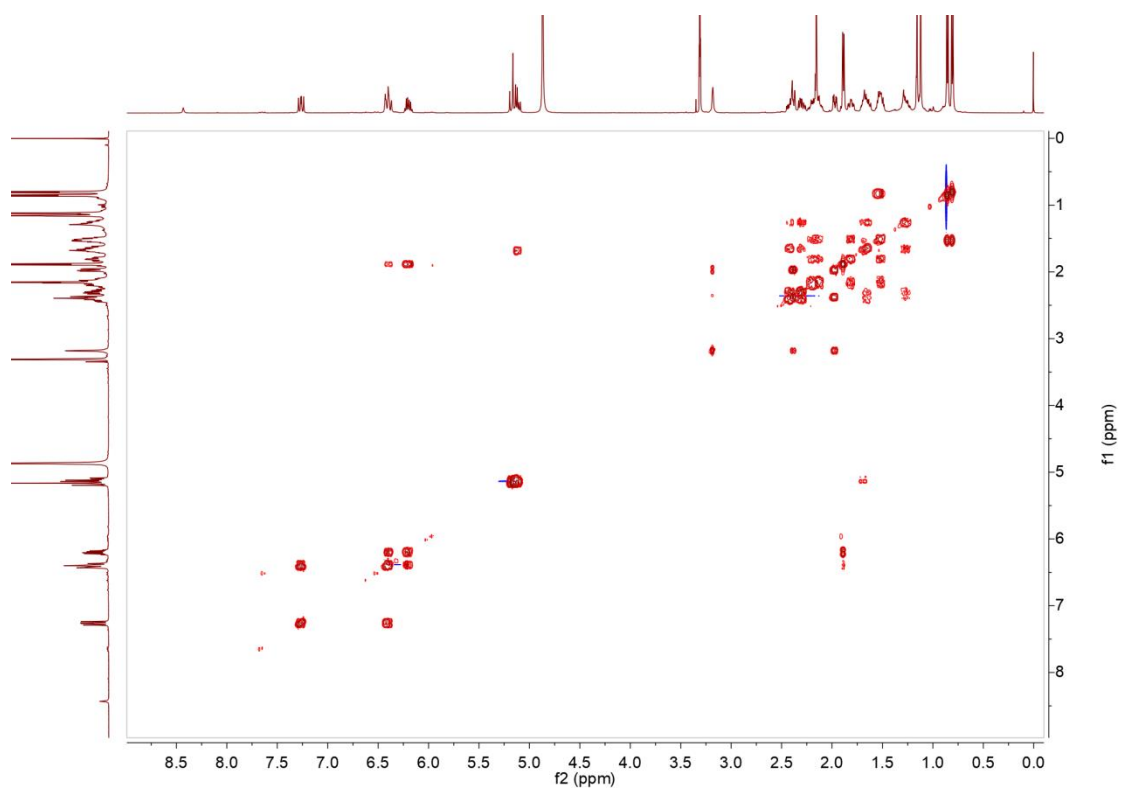

**Figure S3.**  $^1\text{H}$ - $^1\text{H}$  COSY spectrum of acresorbicillinol A (**1**,  $\text{CD}_3\text{OD}$ )

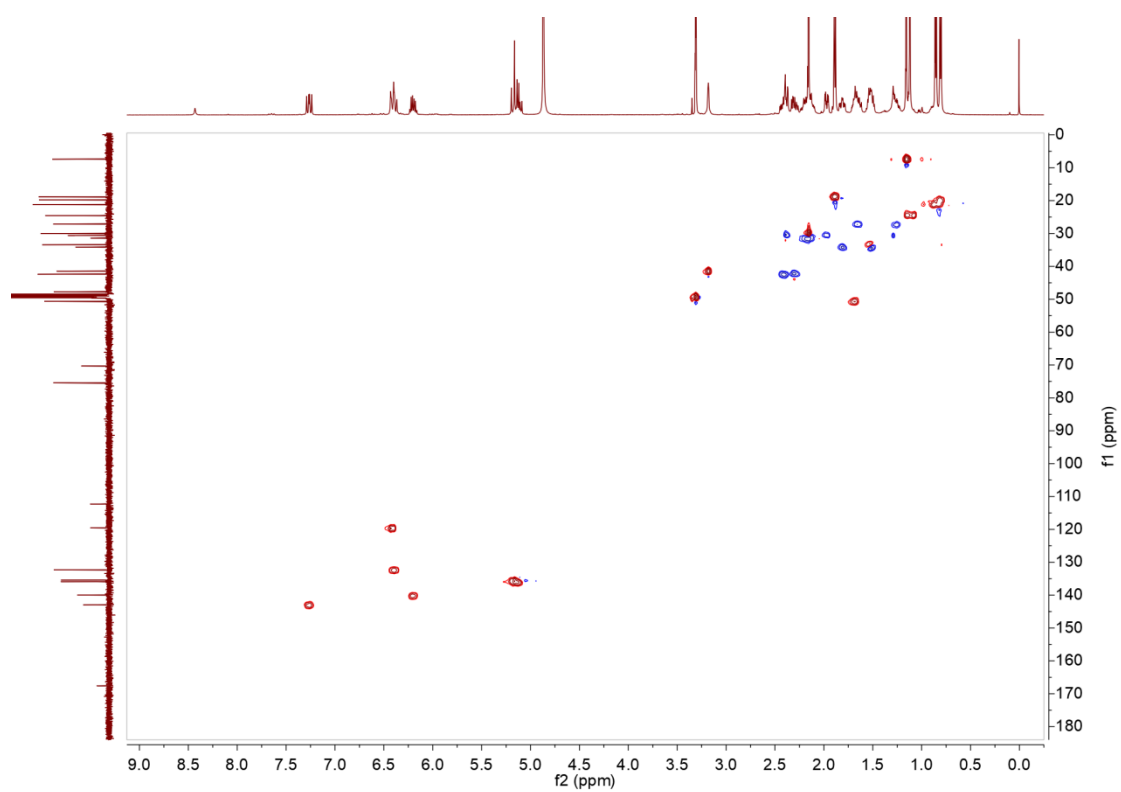

**Figure S4.** HSQC spectrum of acresorbicillinol A (**1**, CD<sub>3</sub>OD)

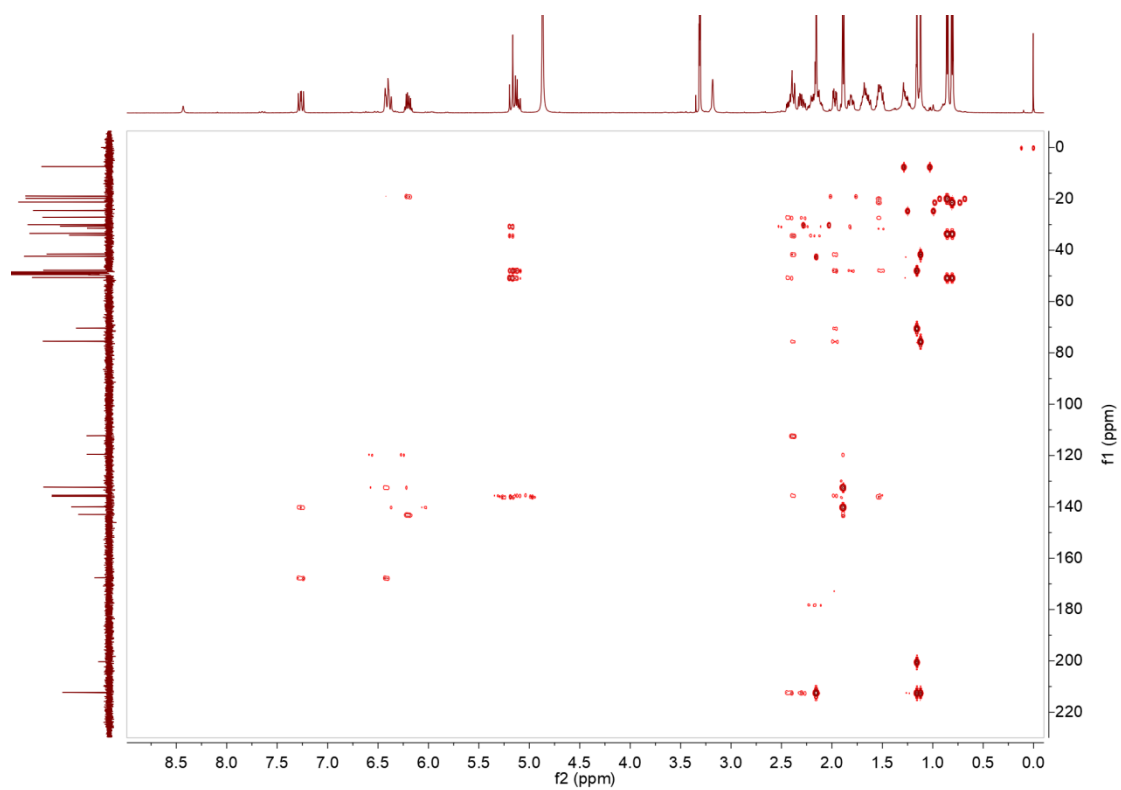

**Figure S5.** HMBC spectrum of acresorbicillinol A (**1**, CD<sub>3</sub>OD)

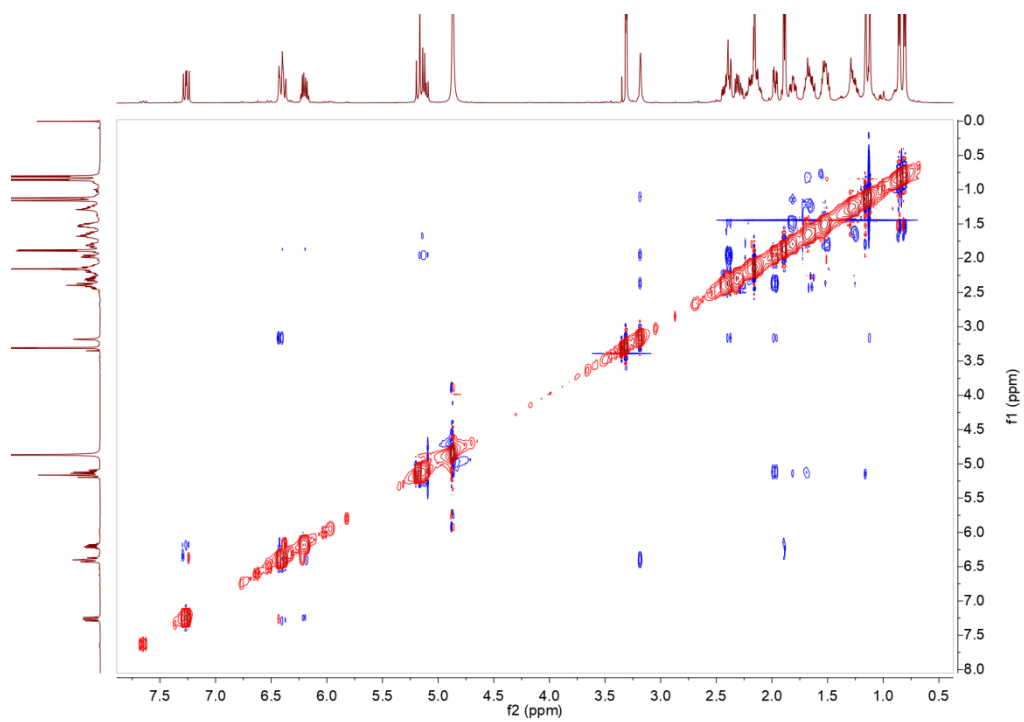

**Figure S6.** NOESY spectrum of acresorbicillinol A (**1**, CD<sub>3</sub>OD)



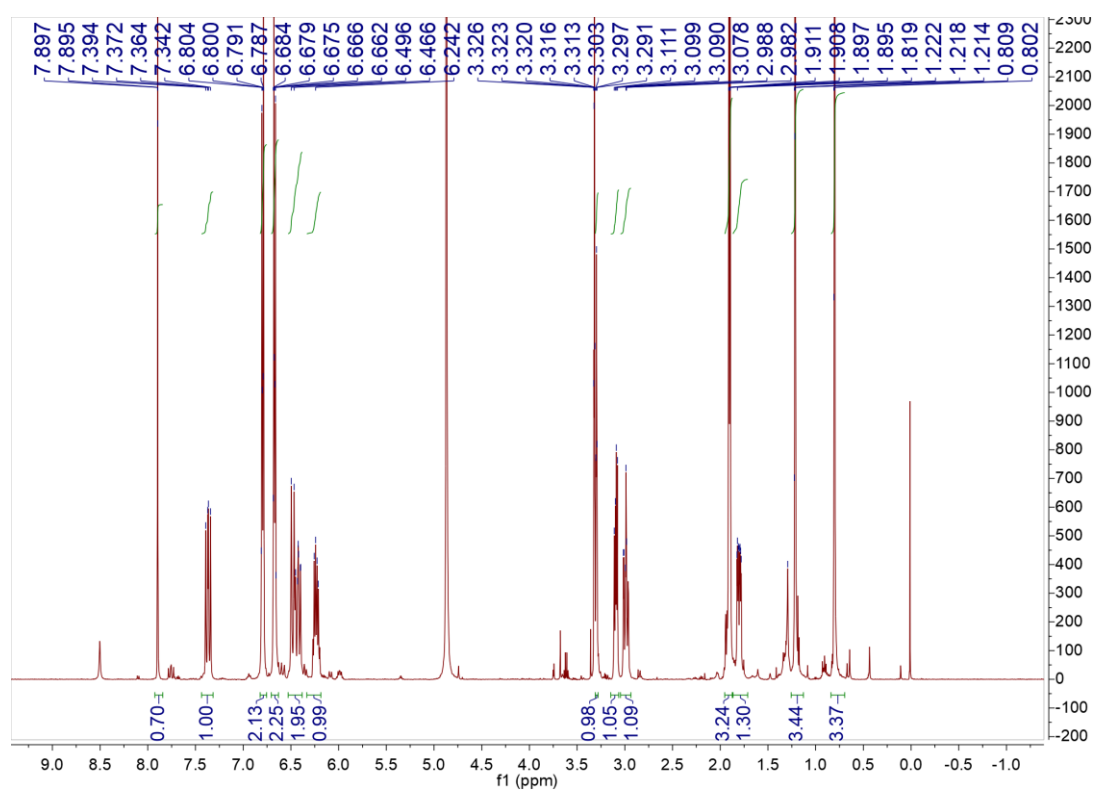

**Figure S7.**  $^1\text{H}$  NMR spectrum of acrosorbicillinol B (2; 500 MHz,  $\text{CD}_3\text{OD}$ )

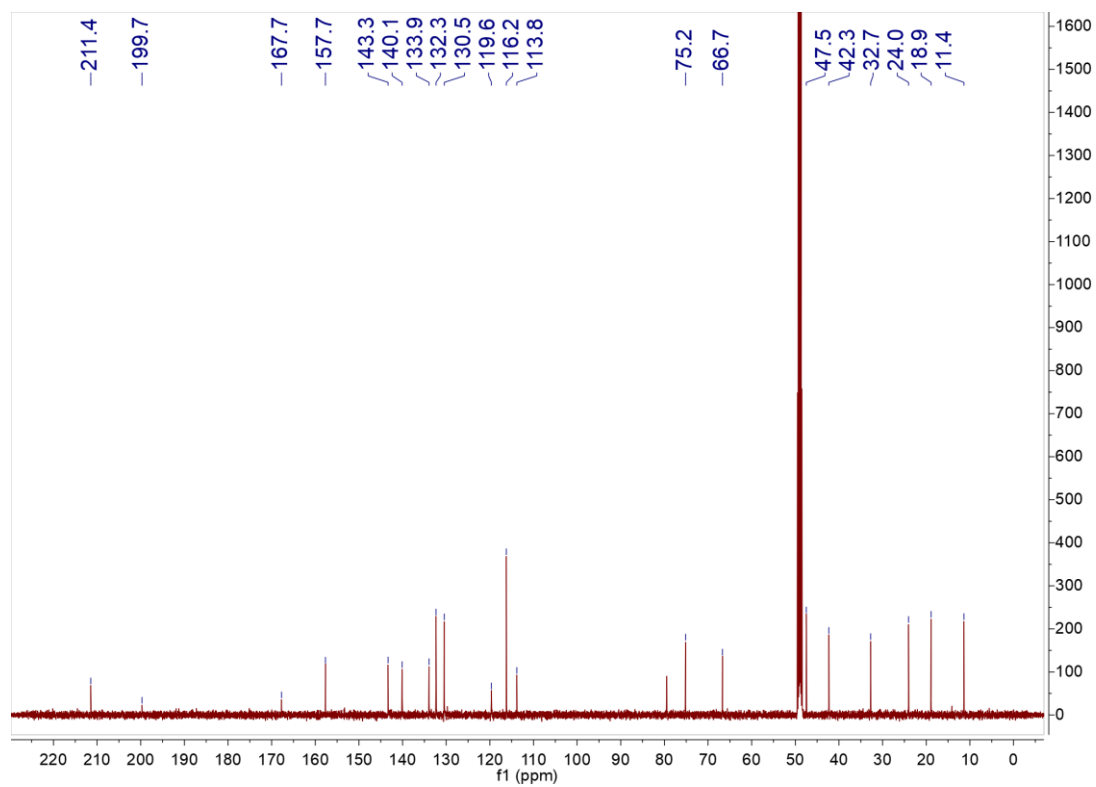

**Figure S8.** <sup>13</sup>C NMR spectrum of acresorbicillinol B (2; 125 MHz, CD<sub>3</sub>OD)

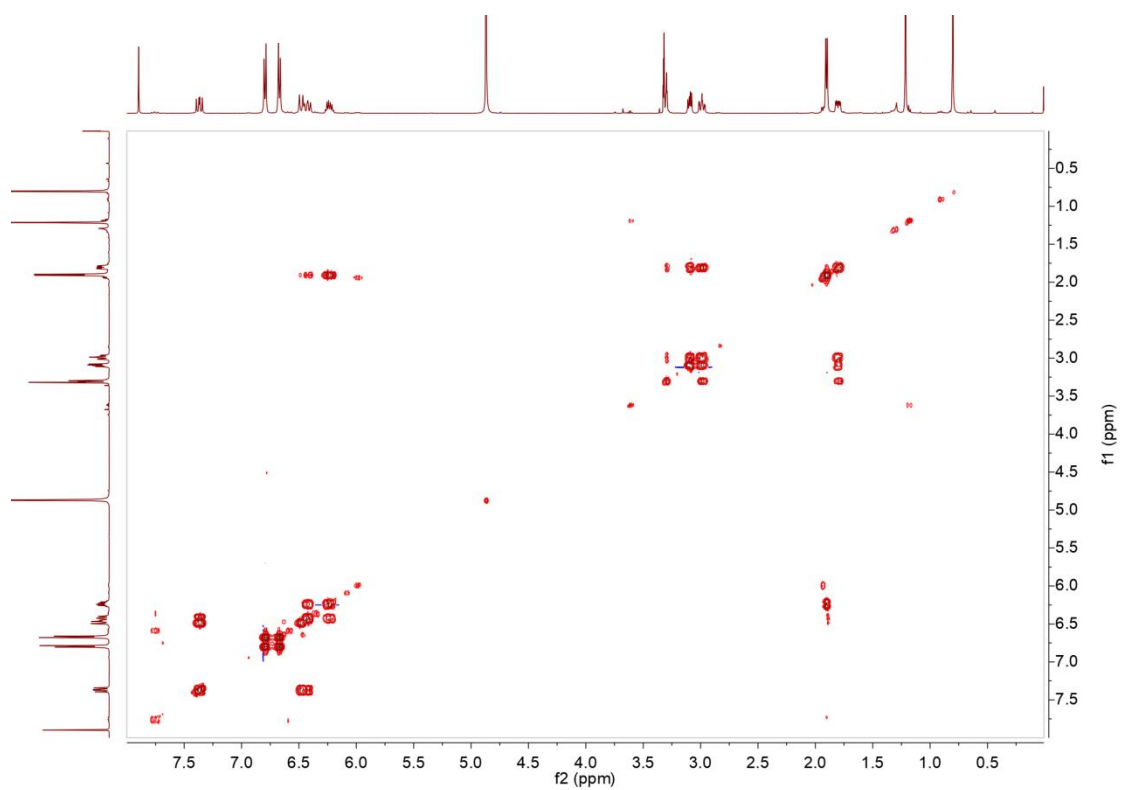

**Figure S9.**  $^1\text{H}$ - $^1\text{H}$  COSY spectrum of acresorbicillinol B (**2**,  $\text{CD}_3\text{OD}$ )

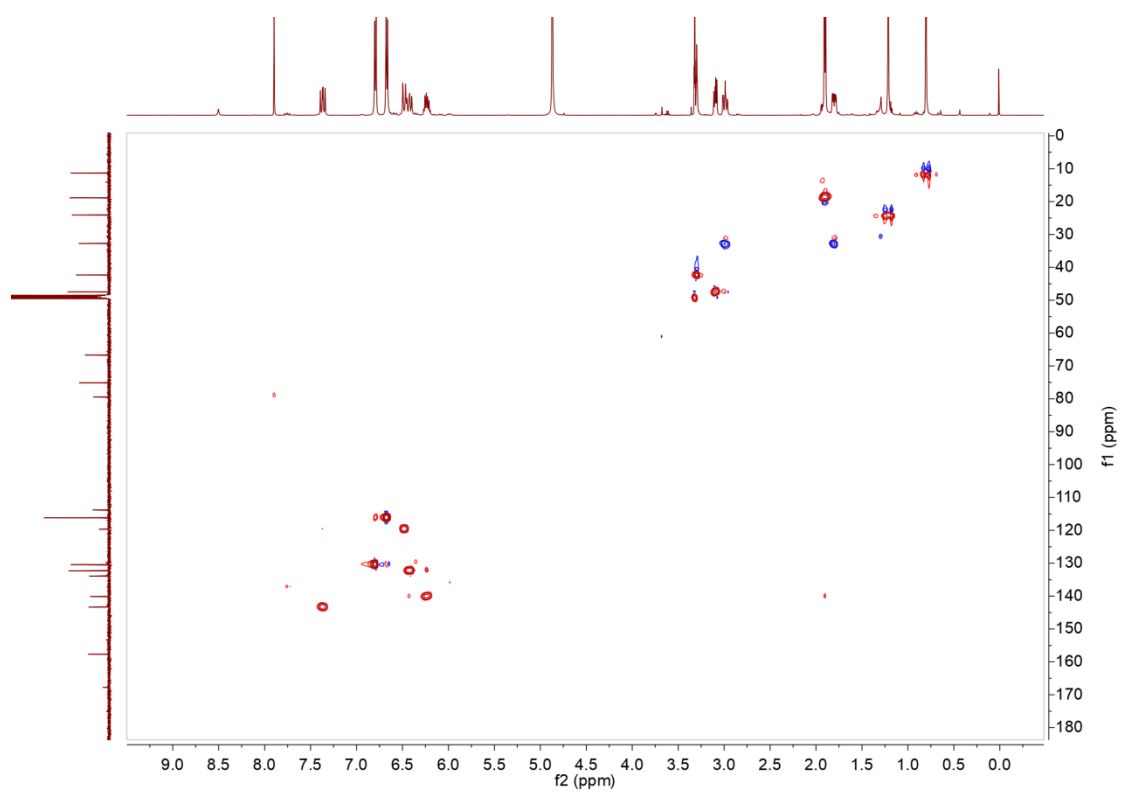

**Figure S10.** HSQC spectrum of acresorbicillinol B (**2**, CD<sub>3</sub>OD)

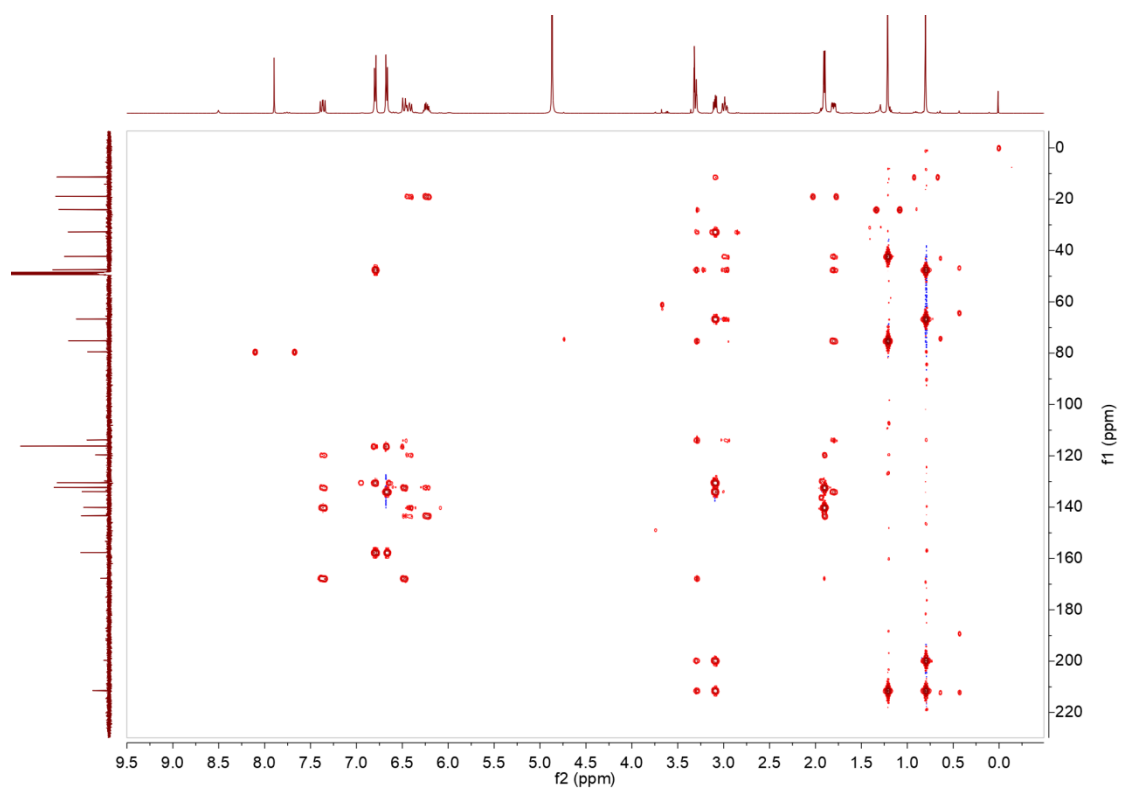

**Figure S11.** HMBC spectrum of acresorbicillinol B (**2**, CD<sub>3</sub>OD)

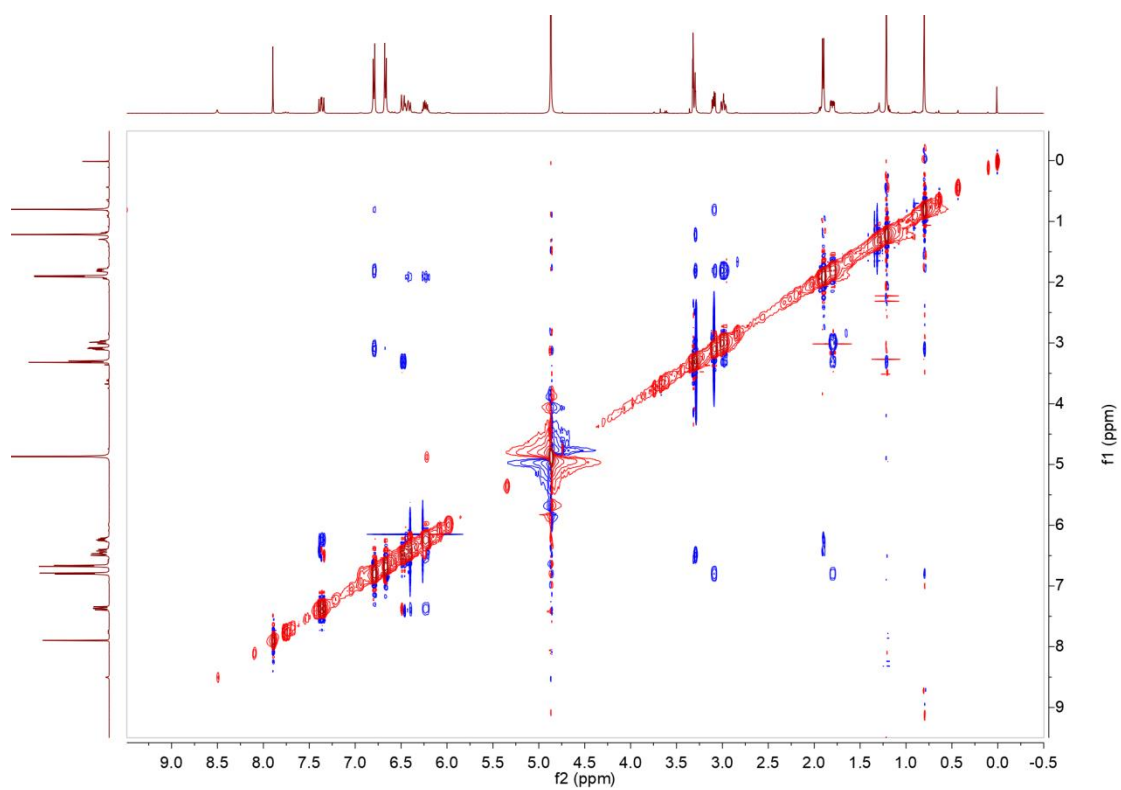

**Figure S12.** NOESY spectrum of acresorbicillinol B (**2**, CD<sub>3</sub>OD)

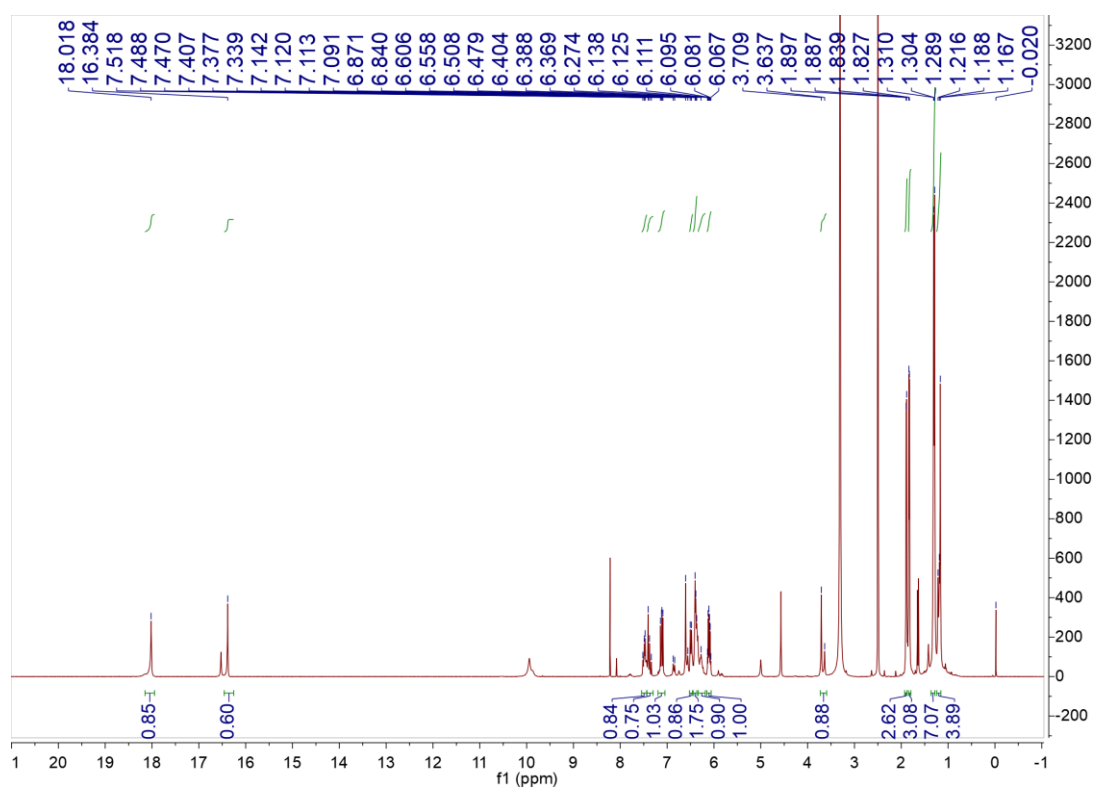

**Figure S13.**  $^1\text{H}$  NMR spectrum of acresorbicillinol C (**3**; 500 MHz, DMSO: $\text{CDCl}_3$  = 3:1)

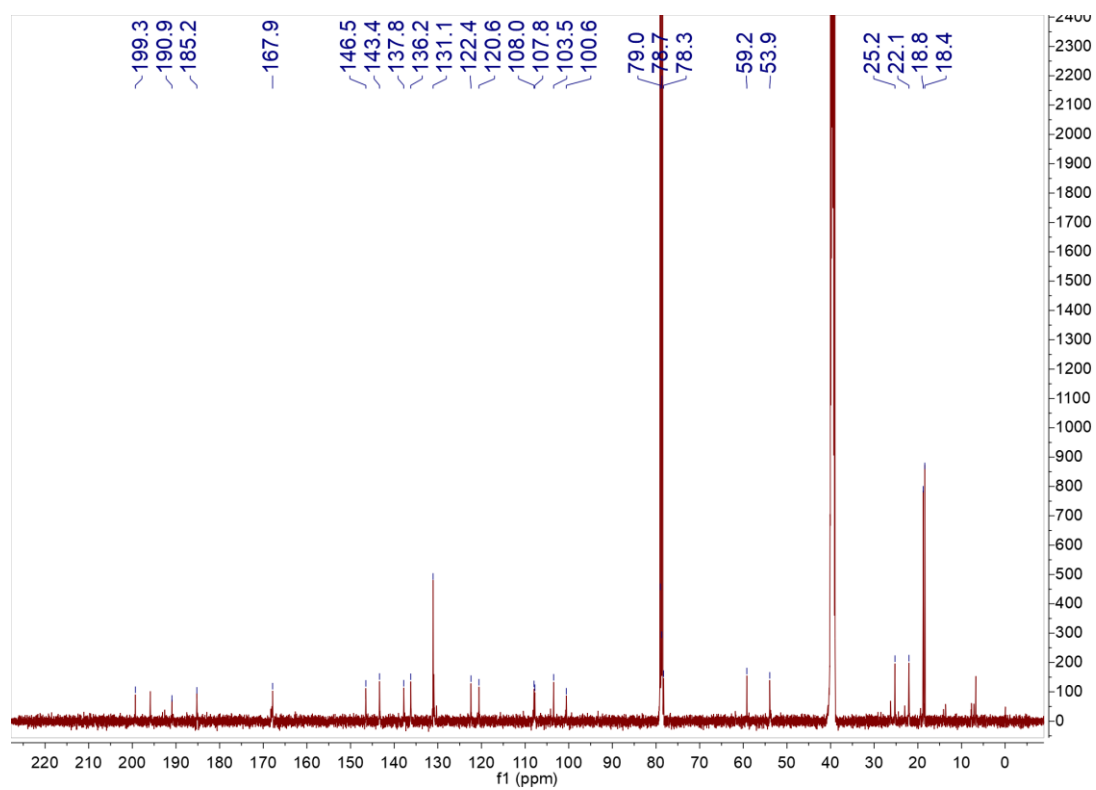

**Figure S14.**  $^{13}\text{C}$  NMR spectrum of acresorbicillinol C (**3**; 125 MHz, DMSO: $\text{CDCl}_3$  = 3:1)



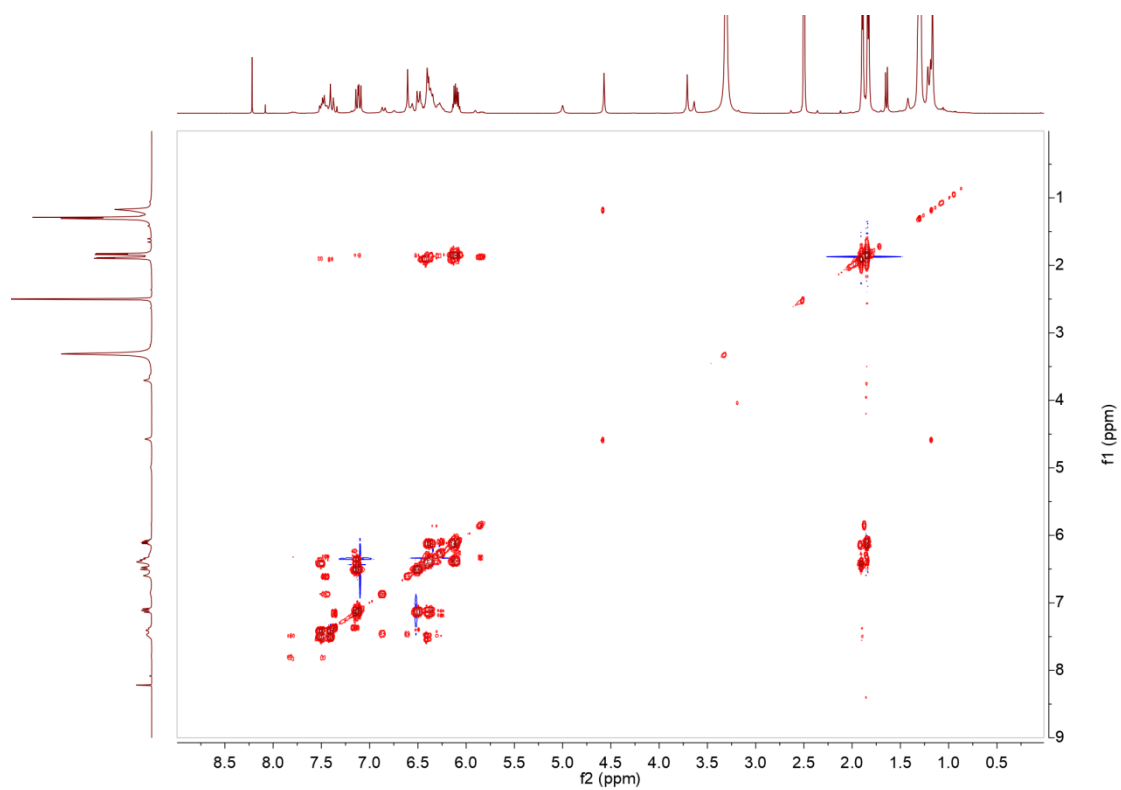

**Figure S15.**  $^1\text{H}$ - $^1\text{H}$  COSY spectrum of acresorbicillinol C (**3**, DMSO: $\text{CDCl}_3$  = 3:1)

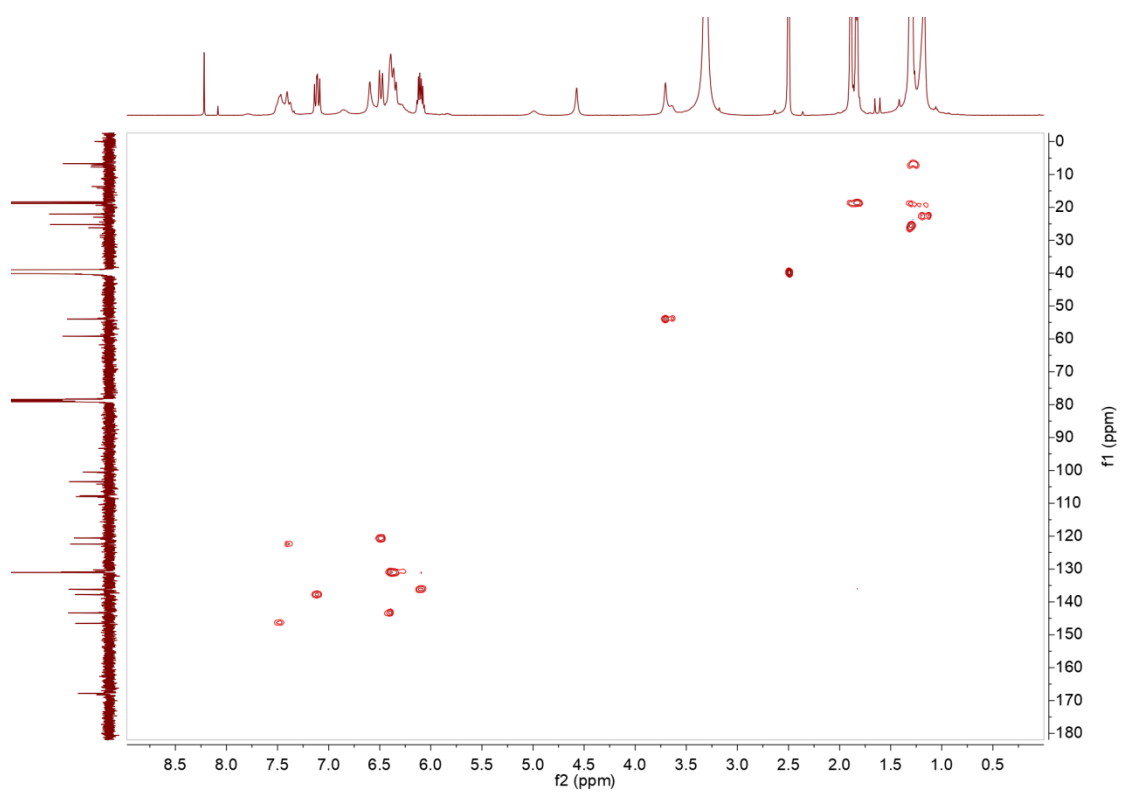

**Figure S16.** HSQC spectrum of acresorbicillinol C (**3**, DMSO:CDCl<sub>3</sub> = 3:1)

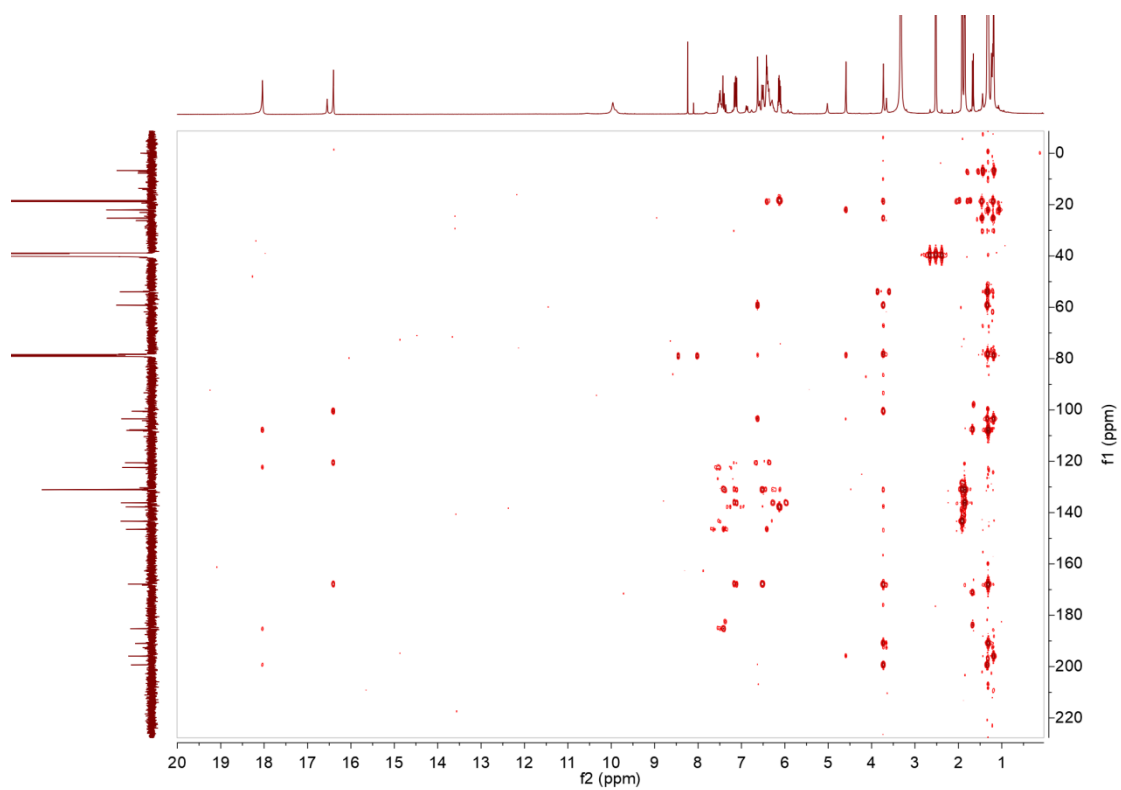

**Figure S17.** HMBC spectrum of acresorbicillinol C (**3**, DMSO:CDCl<sub>3</sub> = 3:1)

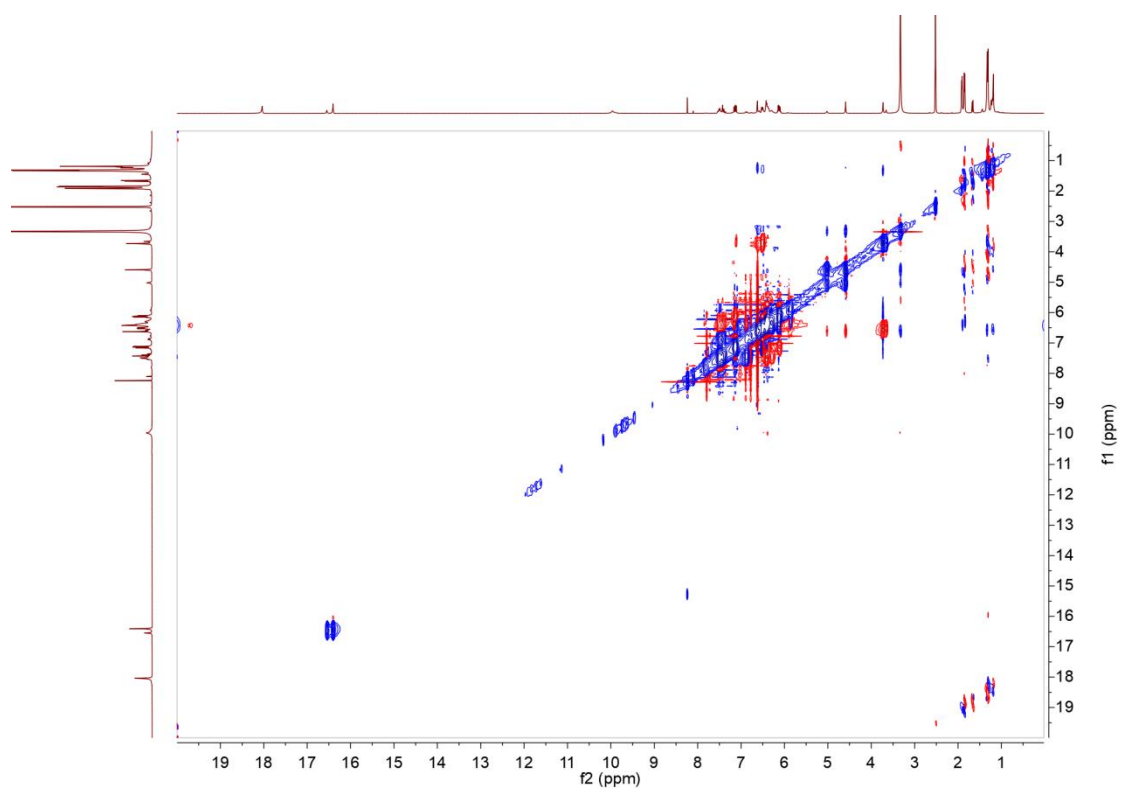

**Figure S18.** NOESY spectrum of acresorbicillinol C (**3**, DMSO:CDCl<sub>3</sub> = 3:1)

| 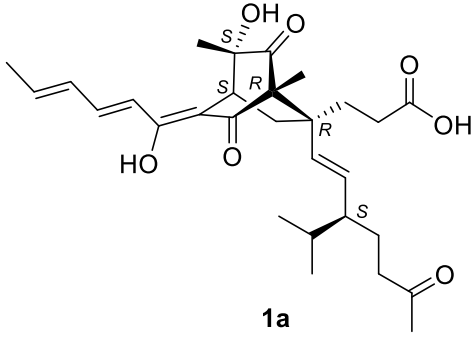 <p><b>1a</b></p>   |             |  <p><b>1c</b></p> |             |
|------------------------------------------------------------------------------------------------------|-------------|-----------------------------------------------------------------------------------------------------|-------------|
| Conformers                                                                                           | Populations | Conformers                                                                                          | Populations |
|                     | 25.49%      |                   | 68.26%      |
|                   | 53.89%      |                 | 31.74%      |
|                   | 20.62%      |                                                                                                     |             |
|  <p><b>2a</b></p> |             |                                                                                                     |             |

| Conformers                                                                                           | Populations |
|------------------------------------------------------------------------------------------------------|-------------|
| 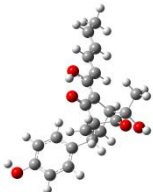                    | 51.44%      |
|                     | 48.56%      |
|  <p><b>3a</b></p> |             |
| Conformers                                                                                           | Populations |
|                   | 1.97%       |
|                   | 8.24%       |

|                                                                                     |               |
|-------------------------------------------------------------------------------------|---------------|
| 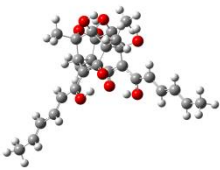   | <p>3.15%</p>  |
|    | <p>12.10%</p> |
|   | <p>15.53%</p> |
|  | <p>53.82%</p> |
|  | <p>1.01%</p>  |

|                                                                                   |              |
|-----------------------------------------------------------------------------------|--------------|
| 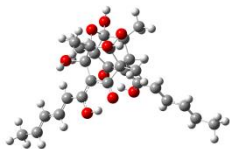 | <p>4.17%</p> |
|-----------------------------------------------------------------------------------|--------------|

**Figure S19.** ECD conformers of acresorbicillinols A–C (**1–3**)



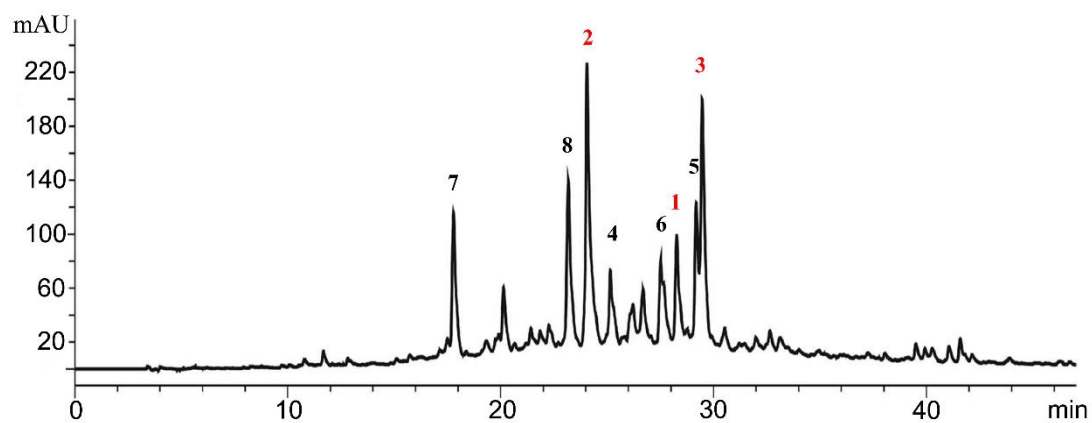

**Figure S20.** HPLC profiles of the extracts from the rice solid medium of *A. chrysogenum* after 7 days fermentation

**Table S1.** Primers used in this study

| Primer        | Sequence               |
|---------------|------------------------|
| actin-F(RT)   | AGTCCAAGCGTGGTATCC     |
| actin-R(RT)   | TAGAAGGCAGGGGCGTTG     |
| AcsorA-F(RT)  | CGCACTTCTTTGACCTCCG    |
| AcsorA-R(RT)  | TTGGCACCGCCACGAT       |
| AcsorB-F(RT)  | GCCATCCTGGGACCACT      |
| AcsorB-R(RT)  | TGAACACGCCGAGACAAC     |
| AcsorC-F(RT)  | TCGGGGAAGGGTACAAGGC    |
| AcsorC-R(RT)  | CTCGACGGACCGCAAGTT     |
| AcsorD-F(RT)  | TGATGGCAATTCCGTCTGG    |
| AcsorD-R(RT)  | GACTCGTTGAGGGCGTTCC    |
| AcsorE-F(RT)  | GGGCTCGTTCCGTCTCGTCT   |
| AcsorE-R(RT)  | CCTCGGGCTGGGATTTGAT    |
| AcsorT-F(RT)  | GTATTCTCGGCGTCGTCTTC   |
| AcsorT-R(RT)  | TTCTTCTTGCCCTGGTTCTT   |
| AcsorR1-F(RT) | CGATGTGGACGACTTGAGG    |
| AcsorR1-R(RT) | TCATACTGCGAGTCCTTGTTAG |
| AcsorR2-F(RT) | GCTGACCAGTACCGCATCG    |
| AcsorR2-R(RT) | GCCCGCCCTAACGTCTAT     |
| orf1-F(RT)    | CGGGATTGTTTCCAAGTCG    |
| orf1-R(RT)    | TCCACCAGGGTTGTGCC      |
| orf2-F(RT)    | CGGAGATACAGGAAGGC      |
| orf2-R(RT)    | CCGCTAAGGCTAGGGTC      |
